# Supplementary material for: A scoping review of global vaccine certificate solutions for COVID-19
Source: Research Square preprint supplement (doi:10.21203/rs.3.rs-334258/v1), 2021-03-16
Supplement: Supplementary file 1 [file 57ea8256da1d0122483032d3.docx]

**Supplementary Table 1**

| **Search Date** | **Search Term** | **Result** | **Notes** |
| --- | --- | --- | --- |
| November 18th 2020 | coronavirus, vaccination certificate | 150 |  |
|  | COVID-19, immunization passport | 150 |  |
|  | COVID-19, vaccination certification | 150 | certification yielded a lot of irrelevant results related to pharmacists receiving a certification and so was not included in future searches |
|  | COVID-19, immunization certificate | 150 |  |
|  | digital immunization passport and COVID-19 | 4 |  |
|  | digital vaccination passport COVID-19 | 11 |  |
|  | digital vaccination certificate and COVID-19 | 150 |  |
| November 19th 2020 | CORONAVIRUS or COVID-19 or SARS COV2, vaccination certificate | 150 |  |
|  | CORONAVIRUS or COVID-19 or SARS COV2, immunization passport | 141 |  |

Initial Search total: 1056

After duplicates removed: 641
